# Supplementary material for: Practical polymerization of functionalized lactones and carbonates with Sn(OTf)2 in metal catalysed ring-opening polymerization methods
Source: Royal Society of Chemistry journal article supplement (doi:10.1039/c3py21119c), 2013-01-01
Supplement: c3py21119c.pdf [file c3py21119c.pdf]

Supplemental Material

**Practical polymerization of functionalized lactones and carbonates  
with Sn(OTf)<sub>2</sub> in metal catalyzed ring-opening polymerization  
methods**

David M. Stevens, Harry A. Watson, Marc-Andre LeBlanc, Ray Y. Wang, Joanne Chou,  
Westley S. Bauer and Eva Harth\*

Vanderbilt University, Department of Chemistry, 7619 Stevenson Center, Nashville, TN,  
USA

Email: [eva.harth@vanderbilt.edu](mailto:eva.harth@vanderbilt.edu)

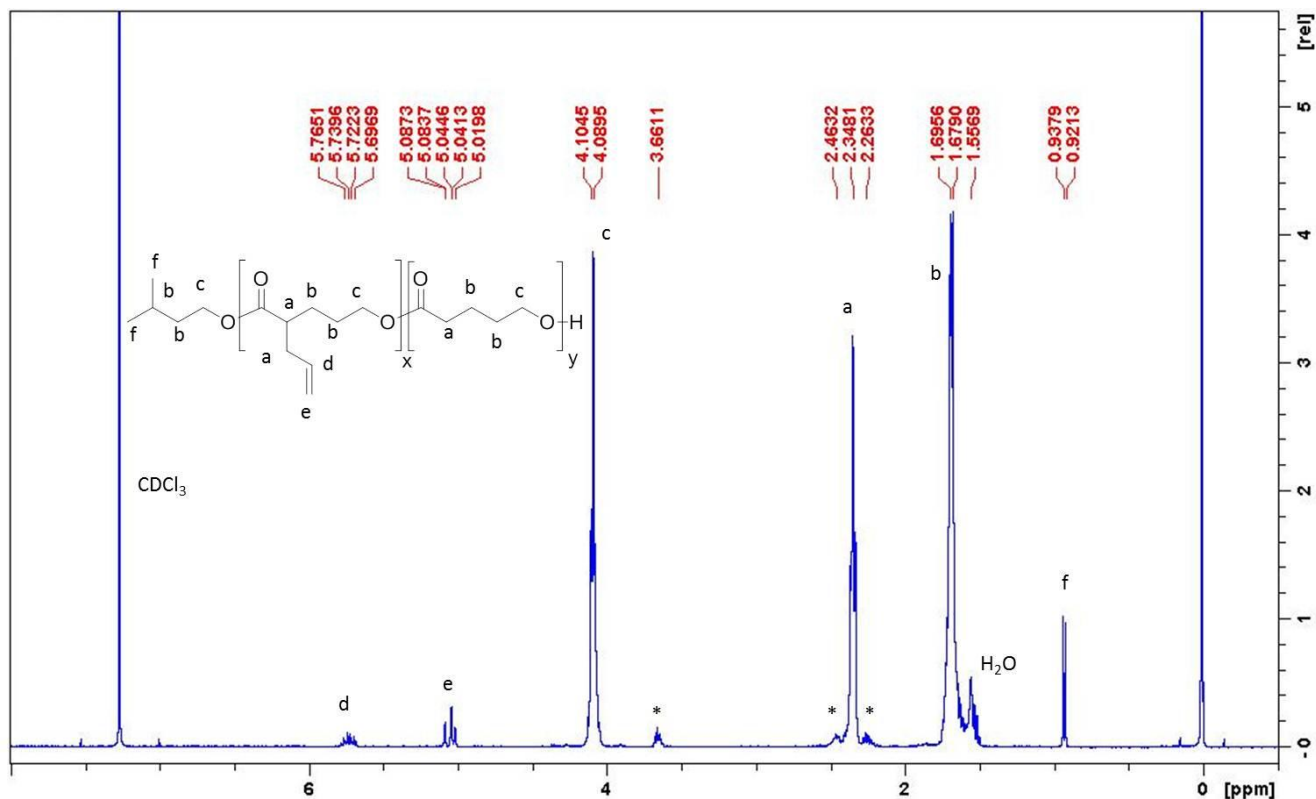

<sup>1</sup>H NMR in CDCl<sub>3</sub> of polyester copolymer containing 10% avl initiated from 3-methyl-1-butanol (400 MHz, \* = protons from terminal unit on polymer), 3.2 K

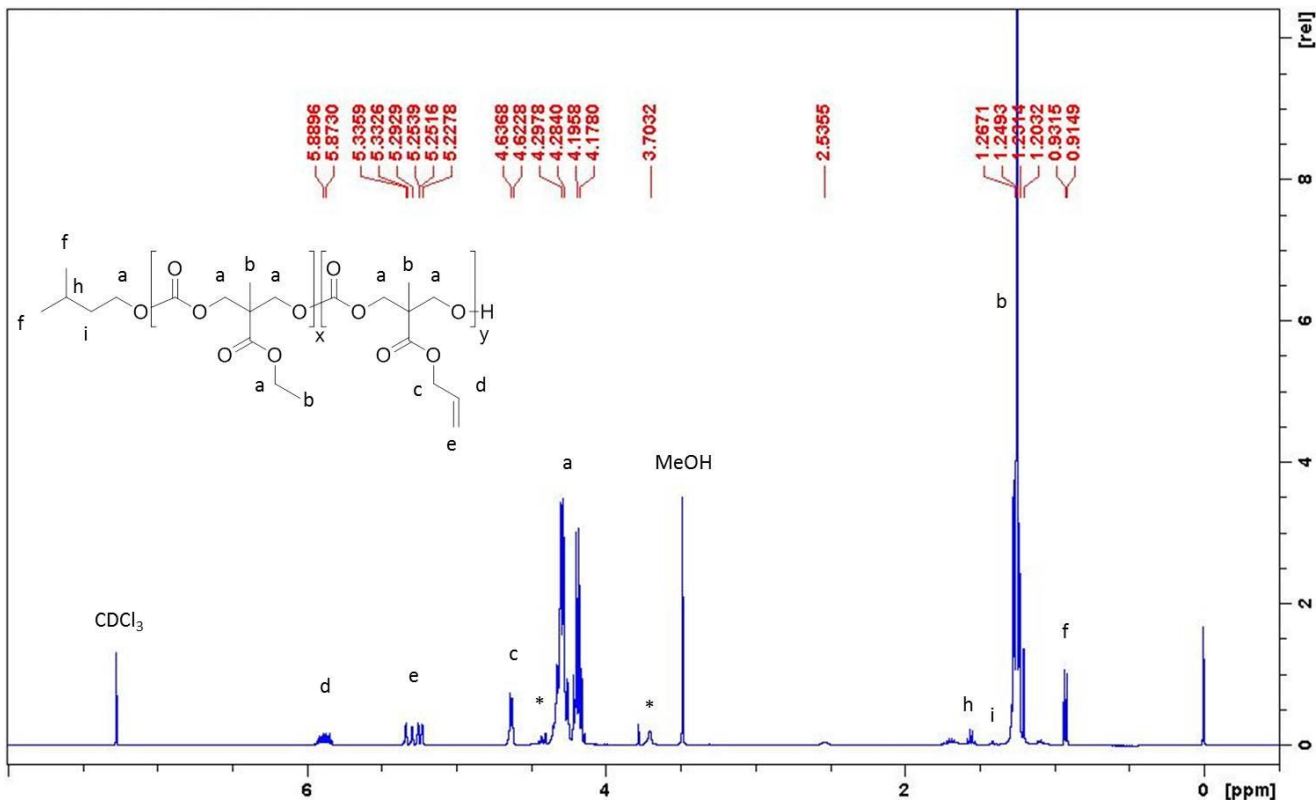

<sup>1</sup>H NMR in CDCl<sub>3</sub> of polycarbonate copolymer containing 20% MAC initiated from 3-methyl-1-butanol (400 MHz, \* = protons from terminal unit on polymer), 4.5K
